# Supplementary material
Source: Springer Nature journal article supplement (https://www.springermedizin.de/resource/supplementary/13643_2014_280_MOESM2_ESM.pdf/9681670)
Supplement: MOESM2 [file 9681670]

## Data collection form

### Notes:

- Be consistent in the order and style used to describe each report.
- Record any missing or unclear information so to indicate that the information was not found in the study report(s) but not forgotten.

### General Information

|                                                            |                                      |
|------------------------------------------------------------|--------------------------------------|
| Study ID (surname of first author and year of publication) | (e.g. Tomioka 2013)                  |
| Date form completed                                        | (dd/mm/yyyy)                         |
| Name of person extracting data                             |                                      |
| Reference citation                                         | (e.g. Medline)                       |
| Type of publication                                        | (e.g. full report, abstract, letter) |
| Notes:                                                     |                                      |

### Study eligibility

| Study Characteristics                                                                                | Eligibility criteria                                 | Eligibility criteria met? |                          |                          | Location in text or source (pg & fig/table) |
|------------------------------------------------------------------------------------------------------|------------------------------------------------------|---------------------------|--------------------------|--------------------------|---------------------------------------------|
|                                                                                                      |                                                      | Yes                       | No                       | Unclear/<br>unspecified  |                                             |
| Type of study                                                                                        | Retrospective cohort study                           | <input type="checkbox"/>  | <input type="checkbox"/> | <input type="checkbox"/> |                                             |
|                                                                                                      | Prospective cohort study                             | <input type="checkbox"/>  | <input type="checkbox"/> | <input type="checkbox"/> |                                             |
|                                                                                                      | Case-control study                                   | <input type="checkbox"/>  | <input type="checkbox"/> | <input type="checkbox"/> |                                             |
| Participants                                                                                         | Employees exposed to BZ and/or BNA in the workplace. | <input type="checkbox"/>  | <input type="checkbox"/> | <input type="checkbox"/> |                                             |
| Types of outcome measures                                                                            | Lung cancer death and/or lung cancer incidence       | <input type="checkbox"/>  | <input type="checkbox"/> | <input type="checkbox"/> |                                             |
|                                                                                                      | Clinically confirmed diagnosis                       | <input type="checkbox"/>  | <input type="checkbox"/> | <input type="checkbox"/> |                                             |
|                                                                                                      | Standardized mortality ratio                         | <input type="checkbox"/>  | <input type="checkbox"/> | <input type="checkbox"/> |                                             |
|                                                                                                      | Standardized incidence ratio                         | <input type="checkbox"/>  | <input type="checkbox"/> | <input type="checkbox"/> |                                             |
|                                                                                                      | Odd ratio                                            | <input type="checkbox"/>  | <input type="checkbox"/> | <input type="checkbox"/> |                                             |
| INCLUDE <input type="checkbox"/> EXCLUDE <input type="checkbox"/> UNCERTAIN <input type="checkbox"/> |                                                      |                           |                          |                          |                                             |
| Reason for exclusion                                                                                 |                                                      |                           |                          |                          |                                             |
| Notes:                                                                                               |                                                      |                           |                          |                          |                                             |

**DO NOT PROCEED IF STUDY EXCLUDED FROM REVIEW**

## Characteristics of included studies

### Study design/characteristics

|                                             | Descriptions as stated in report/paper                                                                                                                                                                                        | Location in text or source (pg & fig/table) |
|---------------------------------------------|-------------------------------------------------------------------------------------------------------------------------------------------------------------------------------------------------------------------------------|---------------------------------------------|
| Study aim/objective                         |                                                                                                                                                                                                                               |                                             |
| Study subjects                              |                                                                                                                                                                                                                               |                                             |
| Reference group                             | National population <input type="checkbox"/><br>Regional population <input type="checkbox"/><br>Population-based control group <input type="checkbox"/><br>Hospital-based control group <input type="checkbox"/><br>Other ( ) |                                             |
| Cancer identification                       | Cancer registry <input type="checkbox"/> Death certificate <input type="checkbox"/><br>Medical record <input type="checkbox"/> Other ( )                                                                                      |                                             |
| Country                                     |                                                                                                                                                                                                                               |                                             |
| Industry type                               |                                                                                                                                                                                                                               |                                             |
| Exposure to BZ                              |                                                                                                                                                                                                                               |                                             |
| Exposure to BNA                             |                                                                                                                                                                                                                               |                                             |
| Exposure assessment/<br>reporting           |                                                                                                                                                                                                                               |                                             |
| Occupational exposure<br>to other chemicals |                                                                                                                                                                                                                               |                                             |
| Information of smoking                      |                                                                                                                                                                                                                               |                                             |
| Related papers<br>(first author, year)      |                                                                                                                                                                                                                               |                                             |
| Potential confounders<br>adjusted           |                                                                                                                                                                                                                               |                                             |
| Study sponsorship                           | Yes <input type="checkbox"/> No <input type="checkbox"/> Unclear <input type="checkbox"/>                                                                                                                                     |                                             |
| Notes:                                      |                                                                                                                                                                                                                               |                                             |

## Study/sample characteristic

|                                  | Reported | Not reported | Unclear | Not applicable | If "reported" is checked, the value is recored. |
|----------------------------------|----------|--------------|---------|----------------|-------------------------------------------------|
| Sample size: recruited           |          |              |         |                |                                                 |
| Sample size: analysed            |          |              |         |                |                                                 |
| Number of total person-years     |          |              |         |                |                                                 |
| Starting year of follow-up       |          |              |         |                |                                                 |
| Ending year of follow-up         |          |              |         |                |                                                 |
| Loss to follow-up (%)            |          |              |         |                |                                                 |
| Proportion males (%)             |          |              |         |                |                                                 |
| Average age                      |          |              |         |                |                                                 |
| Starting year of BZ/BNA exposure |          |              |         |                |                                                 |
| Ending year of BZ/BNA exposure   |          |              |         |                |                                                 |
